# Supplementary material for: Redox-Responsive Crosslinked Mixed Micelles for Controllable Release of Caffeic Acid Phenethyl Ester
Source: MDPI journal article supplement (doi:10.3390/pharmaceutics14030679), 2022-03-20
Supplement: s1 [file s1]

## Supplementary Materials: Redox-Responsive Crosslinked Mixed Micelles for Controllable Release of Caffeic Acid Phenethyl Ester

DLS/ELS measurements revealed that single polymer micelles do not exist in the sample of mixed micelles. The determined diameter of mixed micelles (38 nm) is between  $D_h$  of the two single copolymer micelles (Table S1). The same tendency is found for zeta potential values (Table S1). The zeta potential of mixed micelles is -22 mV, while the single polymer micelles have zeta potential of -33 mV ( $PAA_{13}$ -*b*- $PCL_{35}$ -*b*- $PAA_{13}$ ) and -0.6 mV ( $PEO_{113}$ -*b*- $PCL_{35}$ -*b*- $PEO_{113}$ ), respectively. We have established that mixed micelles, comprising a nonionic and an ionic block, exhibit single zeta-potential value, unlike the mixture of two pre-formed single-polymer micelles (self-assembled separately and then mixed) [1]. Thus, our results are direct proof that only mixed micelles were formed from the  $PEO_{113}$ -*b*- $PCL_{35}$ -*b*- $PEO_{113}$ / $PAA_{13}$ -*b*- $PCL_{35}$ -*b*- $PAA_{13}$  blend at the reported experimental conditions.

**Table S1.** Dynamic and electrophoretic light scattering data and critical micelle concentrations of single copolymer and mixed copolymer micelles.

| Copolymers                                                                                                                                  | Hydrodynamic diameter<br>(nm) | Zeta potential<br>(mV) | Critical micelle concentration<br>(g L <sup>-1</sup> ) |
|---------------------------------------------------------------------------------------------------------------------------------------------|-------------------------------|------------------------|--------------------------------------------------------|
| $PAA_{13}$ - <i>b</i> - $PCL_{35}$ - <i>b</i> - $PAA_{13}$                                                                                  | $86 \pm 3$                    | $-33 \pm 3$            | 0.063                                                  |
| $PEO_{113}$ - <i>b</i> - $PCL_{35}$ - <i>b</i> - $PEO_{113}$                                                                                | $26 \pm 1$                    | $-0.6 \pm 0.1$         | 0.090                                                  |
| $PEO_{113}$ - <i>b</i> - $PCL_{35}$ - <i>b</i> - $PEO_{113}$ / $PAA_{13}$ - <i>b</i> - $PCL_{35}$ - <i>b</i> - $PAA_{13}$ (molar ratio 3:1) | $38 \pm 2$                    | $-22 \pm 3$            | 0.078                                                  |

[1] Kamenova K, Haladjova E, Grancharov G, Kyulavska M, Tzankova V, Aluani D, et al. Co-assembly of block copolymers as a tool for developing novel micellar carriers of insulin for controlled drug delivery. *Eur Polym J.* **2018**, *104*, 1–9.
